# Supplementary material for: Early-Onset Cancers in Adults: A Review of Epidemiology, Supportive Care Needs and Future Research Priorities
Source: MDPI journal article supplement (doi:10.3390/cancers14164021), 2022-08-20
Supplement: s1 [file s1]

Table S1. Classification of cancer type using ICD10

| Cancer type                | ICD10 code           | Cancer type                | ICD10 code |
|----------------------------|----------------------|----------------------------|------------|
| Bladder                    | C67                  | Lung                       | C33-C34    |
| Brain and CNS              | C70-C72, C75.1-C75.3 | Lymphoma                   | C81-C86    |
| Cervical                   | C53                  | Melanoma                   | C43        |
| Colorectal                 | C18-C20              | Ovarian and fallopian tube | C56-C57.4  |
| Connective and soft tissue | C47, C49             | Prostate                   | C61        |
| Breast                     | C50                  | Testicular                 | C62        |
| Head and Neck              | C00-C14, C30-C32     | Thyroid                    | C73        |
| Kidney                     | C64                  | Unknown primary            | C77-C80    |
| Leukaemia                  | C91-C95              | Uterine                    | C54-C55    |

CNS: Central Nervous System

Table S2. Cancer survival (excluding non-melanoma skin cancer) among 18 to 29 year olds: patients diagnosed in 2000-2014, followed up to the end of 2019

| Males                                   |                             |                                     |                                      |                                |                                 |
|-----------------------------------------|-----------------------------|-------------------------------------|--------------------------------------|--------------------------------|---------------------------------|
| Cancer type                             | Number of patients included | One-year observed survival (95% CI) | Five-year observed survival (95% CI) | One-year net survival (95% CI) | Five-year net survival (95% CI) |
| Testicular cancer                       | 287                         | 97.9% (95.4% - 99.1%)               | 95.1% (91.9% - 97.1%)                | 98.0% (96.3% - 99.7%)          | 95.5% (93.0% - 98.0%)           |
| Lymphoma                                | 115                         | 97.4% (92.1% - 99.2%)               | 92.1% (85.3% - 95.8%)                | 97.5% (94.6% - 100.0%)         | 92.2% (87.4% - 97.3%)           |
| Brain and central nervous system cancer | 84                          | 89.3% (80.4% - 94.3%)               | 65.3% (54.1% - 74.4%)                | 89.4% (83.0% - 96.2%)          | 65.6% (56.2% - 76.6%)           |
| Melanoma                                | 84                          | 97.6% (90.8% - 99.4%)               | 94.0% (86.3% - 97.5%)                | 97.7% (94.5% - 100.0%)         | 94.3% (89.4% - 99.5%)           |
| Leukaemia                               | 45                          | 88.9% (75.3% - 95.2%)               | 71.1% (55.5% - 82.1%)                | 89.0% (80.3% - 98.5%)          | 71.3% (59.4% - 85.7%)           |
| Colorectal cancer                       | 16                          | 100%                                | 81.3% (52.5% - 93.5%)                | 100%                           | 81.7% (65.1% - 100.0%)          |
| Head and neck cancer                    | 23                          | 100%                                | 81.7% (58.2% - 92.7%)                | 100%                           | 82.0% (67.6% - 99.6%)           |
| Connective and soft tissue cancer       | 22                          | 59.1% (36.1% - 76.2%)               | 40.9% (20.9% - 60.1%)                | 59.2% (42.2% - 82.9%)          | 41.0% (25.3% - 66.5%)           |
| Thyroid cancer                          | 11                          | 100%                                | 100%                                 | 100%                           | 100%                            |
| Lung cancer                             | 14                          | 92.9% (59.1% - 99.0%)               | 85.7% (53.9% - 96.2%)                | 92.9% (80.7% - 100.0%)         | 85.9% (69.9% - 100.0%)          |
| All cancers (ex NMSC)                   | 778                         | 93.3% (91.3% - 94.9%)               | 83.3% (80.5% - 85.8%)                | 93.4% (91.7% - 95.2%)          | 83.7% (81.1% - 86.4%)           |
| Females                                 |                             |                                     |                                      |                                |                                 |
| Melanoma                                | 191                         | 99.5% (96.3% - 99.9%)               | 97.3% (93.7% - 98.9%)                | 99.5% (98.5% - 100.0%)         | 97.5% (95.2% - 99.8%)           |
| Cervical cancer                         | 205                         | 96.1% (92.3% - 98.0%)               | 89.7% (84.6% - 93.1%)                | 96.1% (93.5% - 98.8%)          | 89.8% (85.8% - 94.1%)           |
| Thyroid cancer                          | 76                          | 100%                                | 100%                                 | 100%                           | 100%                            |
| Lymphoma                                | 101                         | 94.1% (87.3% - 97.3%)               | 92.1% (84.8% - 96.0%)                | 94.1% (89.6% - 98.8%)          | 92.1% (87.0% - 97.5%)           |
| Ovarian and fallopian tube cancer       | 93                          | 95.7% (88.8% - 98.3%)               | 91.2% (83.2% - 95.5%)                | 95.7% (91.6% - 99.9%)          | 91.3% (85.7% - 97.3%)           |
| Breast cancer                           | 76                          | 100%                                | 78.8% (67.7% - 86.4%)                | 100%                           | 78.9% (70.2% - 88.6%)           |
| Brain and central                       | 47                          | 89.4% (76.3% - 95.4%)               | 64.8% (49.1% - 76.8%)                | 89.4% (81.1% - 98.5%)          | 64.9% (52.5% - 80.3%)           |

|                                         |     |                          |                          |                           |                           |
|-----------------------------------------|-----|--------------------------|--------------------------|---------------------------|---------------------------|
| nervous<br>system cancer                |     |                          |                          |                           |                           |
| Leukaemia                               | 37  | 86.5% (70.5% -<br>94.1%) | 72.7% (55.1% -<br>84.3%) | 86.5% (76.3% -<br>98.1%)  | 72.7% (59.8% -<br>88.5%)  |
| Colorectal<br>cancer                    | 18  | 94.4% (66.6% -<br>99.2%) | 83.3% (56.8% -<br>94.3%) | 94.5% (84.7% -<br>100.0%) | 83.4% (68.2% -<br>100.0%) |
| Connective<br>and soft tissue<br>cancer | 12  | 66.7% (33.7% -<br>86.0%) | 50.0% (20.8% -<br>73.6%) | 66.7% (45.6% -<br>97.5%)  | 50.1% (29.4% -<br>85.2%)  |
| All cancers<br>(ex NMSC)                | 929 | 94.8% (93.2% -<br>96.1%) | 87.0% (84.6% -<br>89.0%) | 94.9% (93.4% -<br>96.3%)  | 87.1% (85.0% -<br>89.3%)  |

Table S3. Cancer survival (excluding non-melanoma skin cancer) among 30 to 39 year olds: patients diagnosed in 2000-2014, followed up to the end of 2019

| Males                                   |                             |                                     |                                      |                                |                                 |
|-----------------------------------------|-----------------------------|-------------------------------------|--------------------------------------|--------------------------------|---------------------------------|
| Cancer type                             | Number of patients included | One-year observed survival (95% CI) | Five-year observed survival (95% CI) | One-year net survival (95% CI) | Five-year net survival (95% CI) |
| Testicular cancer                       | 314                         | 99.4% (97.5% - 99.8%)               | 99.4% (97.5% - 99.8%)                | 99.5% (98.6% - 100.0%)         | 99.5% (98.6% - 100.0%)          |
| Melanoma                                | 143                         | 97.9% (93.6% - 99.3%)               | 90.8% (84.7% - 94.6%)                | 98.0% (95.7% - 100.0%)         | 91.5% (86.9% - 96.4%)           |
| Lymphoma                                | 131                         | 95.4% (90.1% - 97.9%)               | 88.5% (81.7% - 92.9%)                | 95.5% (92.0% - 99.2%)          | 88.9% (83.7% - 94.6%)           |
| Colorectal cancer                       | 96                          | 82.1% (72.7% - 88.5%)               | 62.9% (52.3% - 71.7%)                | 82.2% (74.8% - 90.2%)          | 63.3% (54.3% - 73.9%)           |
| Brain and central nervous system cancer | 103                         | 79.5% (70.4% - 86.2%)               | 49.1% (39.1% - 58.3%)                | 79.6% (72.2% - 87.8%)          | 49.5% (40.6% - 60.2%)           |
| Leukaemia                               | 56                          | 94.6% (84.3% - 98.2%)               | 76.8% (63.4% - 85.8%)                | 94.8% (89.1% - 100.0%)         | 77.4% (67.1% - 89.2%)           |
| Thyroid cancer                          | 28                          | 100%                                | 96.4% (77.2% - 99.5%)                | 100%                           | 96.8% (90.3% - 100.0%)          |
| Kidney cancer                           | 24                          | 79.2% (57.0% - 90.8%)               | 70.8% (48.4% - 84.9%)                | 79.3% (64.9% - 96.9%)          | 71.4% (55.6% - 91.7%)           |
| Head and neck cancer                    | 41                          | 87.8% (73.2% - 94.7%)               | 63.4% (46.8% - 76.1%)                | 87.9% (78.6% - 98.4%)          | 63.8% (50.7% - 80.2%)           |
| Connective and soft tissue cancer       | 34                          | 85.3% (68.2% - 93.6%)               | 76.5% (58.4% - 87.5%)                | 85.4% (74.4% - 98.0%)          | 77.0% (64.1% - 92.5%)           |
| All cancers (ex NMSC)                   | 1147                        | 88.7% (86.8% - 90.4%)               | 77.0% (74.4% - 79.3%)                | 88.9% (87.0% - 90.7%)          | 77.5% (75.1% - 80.0%)           |
| Females                                 |                             |                                     |                                      |                                |                                 |
| Breast cancer                           | 782                         | 97.6% (96.2% - 98.4%)               | 81.6% (78.7% - 84.1%)                | 97.6% (96.6% - 98.7%)          | 81.9% (79.2% - 84.7%)           |
| Cervical cancer                         | 439                         | 97.5% (95.5% - 98.6%)               | 91.0% (87.9% - 93.4%)                | 97.6% (96.1% - 99.0%)          | 91.3% (88.7% - 94.1%)           |
| Melanoma                                | 310                         | 99.7% (97.7% - 100.0%)              | 97.7% (95.3% - 98.9%)                | 99.7% (99.1% - 100.0%)         | 98.1% (96.4% - 99.7%)           |
| Thyroid cancer                          | 114                         | 100%                                | 99.1% (93.8% - 99.9%)                | 100%                           | 99.4% (97.7% - 100.0%)          |
| Ovarian and fallopian tube cancer       | 151                         | 94.0% (88.9% - 96.9%)               | 84.7% (77.8% - 89.5%)                | 94.1% (90.4% - 97.9%)          | 84.9% (79.3% - 90.9%)           |
| Colorectal cancer                       | 80                          | 93.8% (85.6% - 97.3%)               | 72.4% (61.2% - 80.9%)                | 93.8% (88.7% - 99.2%)          | 72.6% (63.5% - 83.1%)           |
| Lymphoma                                | 89                          | 95.5% (88.5% - 98.3%)               | 92.1% (84.2% - 96.2%)                | 95.6% (91.4% - 99.9%)          | 92.5% (87.0% - 98.2%)           |

|                                                  |      |                          |                          |                           |                          |
|--------------------------------------------------|------|--------------------------|--------------------------|---------------------------|--------------------------|
| Brain and<br>central<br>nervous<br>system cancer | 52   | 80.8% (67.2% -<br>89.2%) | 61.5% (47.0% -<br>73.2%) | 80.8% (70.9% -<br>92.1%)  | 61.8% (50.0% -<br>76.4%) |
| Head and<br>neck cancer                          | 40   | 92.5% (78.5% -<br>97.5%) | 90.0% (75.5% -<br>96.1%) | 92.6% (84.8% -<br>100.0%) | 90.1% (81.3% -<br>99.7%) |
| Lung cancer                                      | 40   | 62.5% (45.7% -<br>75.4%) | 37.5% (22.9% -<br>52.1%) | 62.5% (49.4% -<br>79.2%)  | 37.6% (25.5% -<br>55.6%) |
| All cancers<br>(ex NMSC)                         | 2353 | 94.3% (93.3% -<br>95.2%) | 82.9% (81.3% -<br>84.4%) | 94.4% (93.5% -<br>95.3%)  | 83.2% (81.7% -<br>84.8%) |

Table S4. Cancer survival (excluding non-melanoma skin cancer) among 40 to 49 year olds: patients diagnosed in 2000-2014, followed up to the end of 2019

| Males                                   |                             |                                     |                                      |                                |                                 |
|-----------------------------------------|-----------------------------|-------------------------------------|--------------------------------------|--------------------------------|---------------------------------|
| Cancer type                             | Number of patients included | One-year observed survival (95% CI) | Five-year observed survival (95% CI) | One-year net survival (95% CI) | Five-year net survival (95% CI) |
| Colorectal cancer                       | 396                         | 82.8% (78.7% - 86.2%)               | 55.3% (50.2% - 60.0%)                | 83.1% (79.4% - 86.9%)          | 56.2% (51.4% - 61.4%)           |
| Melanoma                                | 233                         | 97.8% (94.9% - 99.1%)               | 87.9% (82.9% - 91.5%)                | 98.1% (96.2% - 100.0%)         | 89.2% (85.1% - 93.6%)           |
| Head and neck cancer                    | 245                         | 84.5% (79.3% - 88.5%)               | 59.9% (53.4% - 65.7%)                | 84.7% (80.3% - 89.4%)          | 60.8% (54.9% - 67.4%)           |
| Lymphoma                                | 257                         | 89.5% (85.1% - 92.7%)               | 83.2% (78.1% - 87.3%)                | 89.7% (86.1% - 93.6%)          | 84.5% (80.0% - 89.3%)           |
| Kidney cancer                           | 136                         | 83.1% (75.7% - 88.4%)               | 70.6% (62.1% - 77.5%)                | 83.3% (77.2% - 89.8%)          | 71.6% (64.3% - 79.8%)           |
| Prostate cancer                         | 160                         | 98.1% (94.3% - 99.4%)               | 86.1% (79.7% - 90.6%)                | 98.4% (96.3% - 100.0%)         | 87.6% (82.3% - 93.2%)           |
| Lung cancer                             | 224                         | 39.7% (33.3% - 46.1%)               | 17.0% (12.4% - 22.2%)                | 39.9% (33.9% - 46.8%)          | 17.2% (12.9% - 23.0%)           |
| Testicular cancer                       | 215                         | 96.7% (93.3% - 98.4%)               | 92.5% (88.1% - 95.4%)                | 96.9% (94.6% - 99.3%)          | 93.9% (90.4% - 97.5%)           |
| Brain and central nervous system cancer | 128                         | 68.0% (59.1% - 75.3%)               | 30.2% (22.4% - 38.3%)                | 68.1% (60.5% - 76.7%)          | 30.6% (23.5% - 39.8%)           |
| Leukaemia                               | 101                         | 90.1% (82.4% - 94.5%)               | 73.3% (63.5% - 80.8%)                | 90.3% (84.7% - 96.3%)          | 74.2% (66.0% - 83.4%)           |
| All cancers (ex NMSC)                   | 2760                        | 78.2% (76.6% - 79.7%)               | 59.3% (57.5% - 61.1%)                | 78.4% (76.8% - 79.9%)          | 60.3% (58.4% - 62.2%)           |
| Females                                 |                             |                                     |                                      |                                |                                 |
| Breast cancer                           | 2769                        | 98.2% (97.6% - 98.6%)               | 87.0% (85.7% - 88.2%)                | 98.3% (97.8% - 98.8%)          | 87.9% (86.6% - 89.2%)           |
| Melanoma                                | 380                         | 99.2% (97.6% - 99.7%)               | 95.0% (92.3% - 96.8%)                | 99.4% (98.5% - 100.0%)         | 95.9% (93.7% - 98.1%)           |
| Colorectal cancer                       | 344                         | 86.0% (81.9% - 89.3%)               | 61.9% (56.6% - 66.8%)                | 86.2% (82.6% - 89.9%)          | 62.6% (57.6% - 68.0%)           |
| Ovarian and fallopian tube cancer       | 328                         | 92.4% (88.9% - 94.8%)               | 72.5% (67.3% - 77.0%)                | 92.5% (89.7% - 95.4%)          | 73.2% (68.5% - 78.2%)           |
| Cervical cancer                         | 297                         | 94.6% (91.4% - 96.7%)               | 80.4% (75.4% - 84.5%)                | 94.8% (92.2% - 97.4%)          | 81.1% (76.7% - 85.8%)           |
| Uterine cancer                          | 248                         | 97.6% (94.7% - 98.9%)               | 89.1% (84.4% - 92.4%)                | 97.7% (95.9% - 99.7%)          | 90.0% (86.2% - 94.1%)           |
| Thyroid cancer                          | 120                         | 100%                                | 95.8% (90.3% - 98.2%)                | 100%                           | 96.7% (93.2% - 100.0%)          |
| Lung cancer                             | 205                         | 42.2% (35.3% - 48.8%)               | 17.9% (13.0% - 23.5%)                | 42.2% (36.0% - 49.6%)          | 18.1% (13.5% - 24.3%)           |

|                          |      |                       |                       |                       |                       |
|--------------------------|------|-----------------------|-----------------------|-----------------------|-----------------------|
| Lymphoma                 | 197  | 92.9% (88.3% - 95.7%) | 83.7% (77.7% - 88.2%) | 93.0% (89.5% - 96.7%) | 84.5% (79.5% - 89.9%) |
| Kidney cancer            | 91   | 80.2% (70.5% - 87.0%) | 72.5% (62.1% - 80.5%) | 80.3% (72.6% - 88.9%) | 73.2% (64.6% - 83.0%) |
| All cancers<br>(ex NMSC) | 5602 | 91.0% (90.2% - 91.7%) | 77.8% (76.6% - 78.8%) | 91.1% (90.4% - 91.9%) | 78.5% (77.5% - 79.7%) |

Figure S1. One-year and five-year net survival for all cancers (excluding non-melanoma skin cancer) for males and females by age group

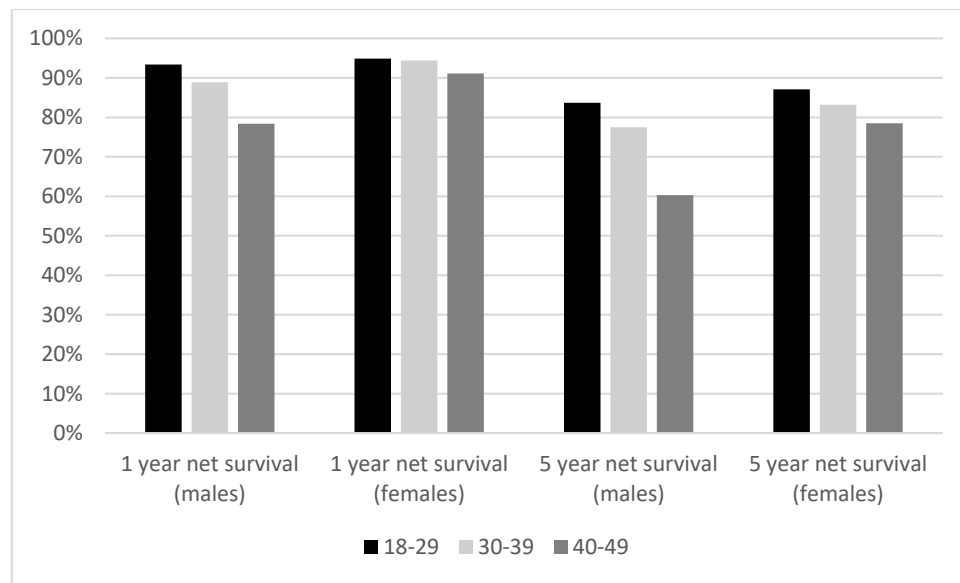

Figure S2. One-year net survival for males by age group diagnosed in 2000-2014, followed up to end of 2019\*

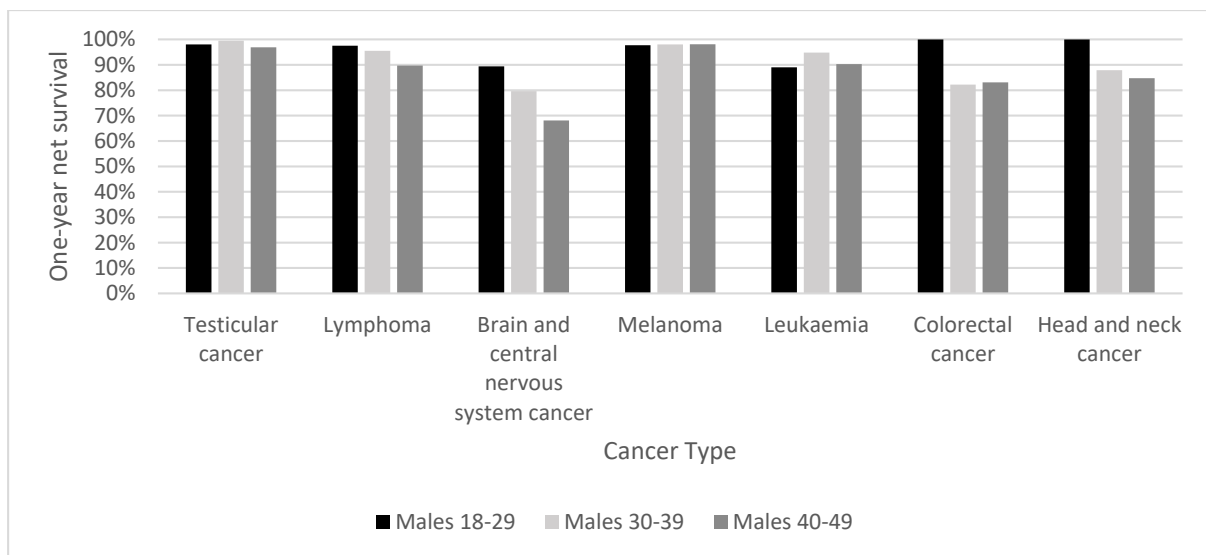

\*Cancer types displayed are the cancers common to all three age groups in males



Figure S3. One-year net survival for females by age group diagnosed in 2000-2014, followed up to end of 2019\*

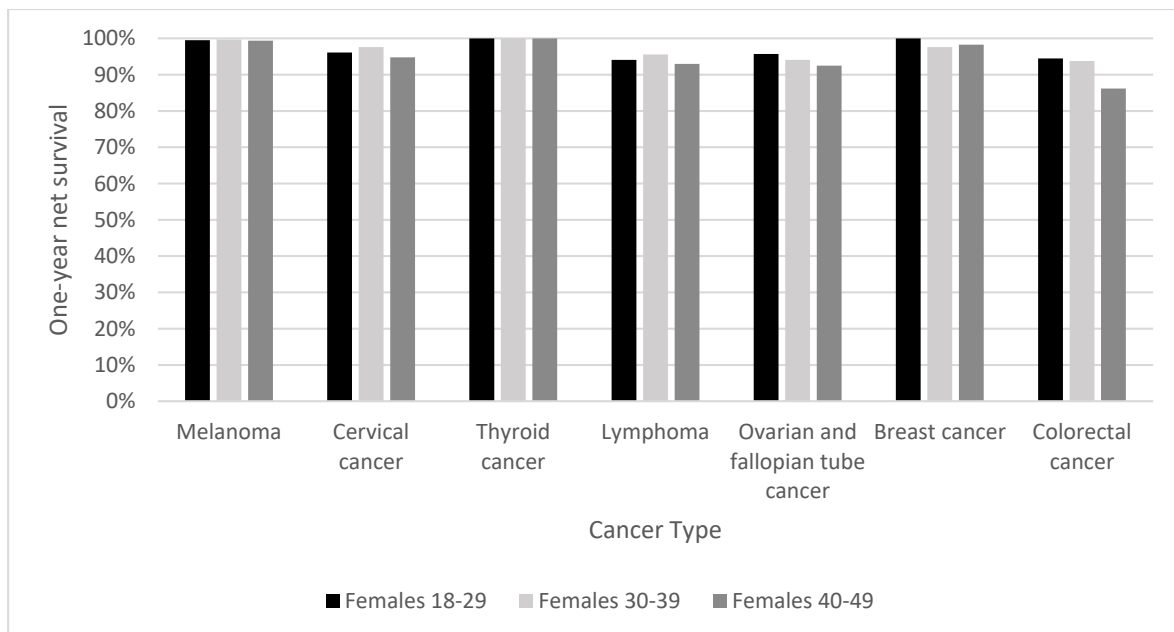

\*Cancer types displayed are the cancers common to all three age groups in females
